# Supplementary material
Source: bioRxiv or medRxiv preprint supplement (https://medrxiv.org/highwire/filestream/81072/field_highwire_adjunct_files/0/2020.04.19.20070722-1.pdf)
Supplement: Supplementary file [file 2020.04.19.20070722-1.pdf]

# Between-centre differences for COVID-19 ICU mortality from early data in England

## ANALYSIS SUPPLEMENT

Zhaozhi Qian<sup>1</sup>, Ahmed M. Alaa<sup>2</sup>, Mihaela van der Schaar<sup>1</sup>, and Ari Ercole<sup>3,\*</sup>

<sup>1</sup>University of Cambridge Centre for Mathematical Sciences, Wilberforce Rd, Cambridge CB3 0WA, UK

<sup>2</sup>University of California, Los Angeles, CA 90095, USA

<sup>3</sup>University of Cambridge Division of Anaesthesia, Addenbrooke's Hospital, Hills Road, Cambridge CB2 0QQ, UK

\*Corresponding author

This file contains the code from the analysis as canonical documentation of the pre-processing and modelling assumptions.

Libraries used (latest versions as of 4/2020)

```
> library(ggplot2)
```

```
> library(dplyr)
```

```
> library(reshape2)
```

```
> library(coxme)
```

```
> library(tidyr)
```

Data cleaning specification

```
> update_date = '14/4/2020'
```

```
> update_dt = as.Date('14/4/2020', format="%d/%m/%Y")
```

```
> dat = read.csv(file='data/letter_data.csv', stringsAsFactors = FALSE)
```

```
> names(dat) = tolower(names(dat))
```

```
> dat = dat %>%
```

```
+ mutate(dateupdated = gsub(".*$", "", dateupdated)) %>%
```

```
+ mutate_at(.vars=c('dateupdated', 'hospitaladmissiondate', 'dateadmittedicu', 'dateleavingicu', 'finaloutcomeate'),
```

```
+ .funs = function(x) as.Date(x, format="%m/%d/%Y"))
```

```

> dt = dat$dateupdated

> dt[is.na(dt)] = update_dt

> dat$dateupdated = dt

> dat = dat %>%

+   mutate(hospital_ttc = as.numeric(dateupdated - hospitaladmissiondate),

+     icu_ttc = as.numeric(dateupdated - dateadmittedicu),

+     outcome_time = as.numeric(finaloutcomedate - hospitaladmissiondate),

+     time_to_icu = as.numeric(dateadmittedicu - hospitaladmissiondate),

+     icu_duration = as.numeric(dateleavingicu - dateadmittedicu)

+   ) %>%

+   mutate(finaloutcome = ifelse(finaloutcome == "Transferred", "", finaloutcome)) %>%

+   mutate_at(.vars=c('dateupdated', 'hospitaladmissiondate', 'dateadmittedicu', 'finaloutcomedate', 'dateleavingicu'),

+     .funs = as.character) %>%

+   mutate_all(.funs=function(x) x = ifelse((x == 'Unknown') | (x == 'No') | (x == 'Borderline'), "", x)) %>%

+   mutate(sex = ifelse(sex == 'Male', 'Male', "")) %>%

+   mutate(

+     death_ind = finaloutcome == 'Death',

+     icu_ind = !is.na(time_to_icu),

+     discharge_ind = finaloutcome == 'Discharged',

+     death_time = coalesce(outcome_time, hospital_ttc),

+     icu_time = coalesce(time_to_icu, hospital_ttc),

+     discharge_time = coalesce(outcome_time, hospital_ttc),

+   ) %>% group_by(caseid) %>% filter(row_number(caseid) == 1) %>% ungroup() %>%

+   filter(wasthepatientadmittedtoicu == 'Yes')

> # there are 3092 icu patients

```

```

> nrow(dat)

[1] 3092

> # death 609

> dat %>%

+ filter(finaloutcome == 'Death') %>%

+ summarise(n=n())

# A tibble: 1 x 1

  n

<int>

1 609

> # ICU discharge 384

> dat %>%

+ filter(!is.na(dateleavingicu) & finaloutcome != 'Death') %>%

+ summarise(n=n())

# A tibble: 1 x 1

  n

<int>

1 384

> dat = dat %>%

+ mutate(

+   ageyear = ifelse((is.na(ageyear) | ageyear == 0), median(ageyear, na.rm=TRUE), ageyear),

+   sex = replace_na(sex, 'Male'),

+ )

> dat$age = dat$ageyear

> dat$ageyear = (dat$ageyear - mean(dat$ageyear)) / sd(dat$ageyear)

> nrow(dat)

```

[1] 3092

```
> trust_scores = read.csv('data/letter_trusts_linked.csv', stringsAsFactors = FALSE)
> apache = read.csv('data/apache.csv', stringsAsFactors = FALSE)
> apache = apache %>%
+   group_by(hospname) %>%
+   summarise(apache = median(apache))
> dat2 = dat %>%
+   inner_join(trust_scores, by='trustname')%>%
+   inner_join(apache, by='hospname')
> dat2$apache_mean = (dat2$apache - mean(dat2$apache)) / sd(dat2$apache)
> dat2$agecut = cut(dat2$age, c(0, 50, 60, 70, 80, 999))
```

#### Define and fit Cox model

```
> model = coxme(Surv(death_time , death_ind) ~
+   agecut +
+   sex +
+   chonicrespiratory+
+   asthmarequiring+
+   chronicheart +
+   chronicrenal +
+   chronicliver +
+   chronicneurological +
+   isdiabetes +
+   immunosuppressiontreatment +
+   immunosuppressiondisease +
```

```

+ obesityclinical +
+ hypertension +
+ apache_mean +
+ (1|trustcode), dat2 )

```

```
> summary(model)
```

Cox mixed-effects model fit by maximum likelihood

Data: dat2

events, n = 605, 3080

Iterations= 13 110

NULL Integrated Fitted

Log-likelihood -4477.025 -4161.828 -4064.469

|                   | Chisq  | df    | p | AIC    | BIC    |
|-------------------|--------|-------|---|--------|--------|
| Integrated loglik | 630.39 | 18.00 | 0 | 594.39 | 515.10 |
| Penalized loglik  | 825.11 | 80.34 | 0 | 664.44 | 310.53 |

Model: Surv(death\_time, death\_ind) ~ agecut + sex + chonicrespiratory + asthmarequiring + chronicheart + chronicrenal + chronicliver + chronicneurological + isdiabetes + immunosuppressiontreatment + immunosuppressiondisease + obesityclinical + hypertension + apache\_mean + (1 | trustcode)

Fixed coefficients

|                      | coef        | exp(coef) | se(coef)  | z    | p       |
|----------------------|-------------|-----------|-----------|------|---------|
| agecut(50,60]        | 0.426456767 | 1.5318203 | 0.1699031 | 2.51 | 1.2e-02 |
| agecut(60,70]        | 0.977811765 | 2.6586322 | 0.1605738 | 6.09 | 1.1e-09 |
| agecut(70,80]        | 1.622708934 | 5.0667974 | 0.1673715 | 9.70 | 0.0e+00 |
| agecut(80,999]       | 1.976208090 | 7.2153312 | 0.2184487 | 9.05 | 0.0e+00 |
| sexMale              | 0.207526316 | 1.2306301 | 0.1002270 | 2.07 | 3.8e-02 |
| chonicrespiratoryYes | 0.493508253 | 1.6380529 | 0.1436712 | 3.43 | 5.9e-04 |

|                               |              |           |           |       |         |
|-------------------------------|--------------|-----------|-----------|-------|---------|
| asthmarequiringYes            | 0.003522413  | 1.0035286 | 0.1522956 | 0.02  | 9.8e-01 |
| chronicheartYes               | 0.433054805  | 1.5419607 | 0.1421668 | 3.05  | 2.3e-03 |
| chronicrenalYes               | 0.743962453  | 2.1042570 | 0.1816631 | 4.10  | 4.2e-05 |
| chronicliverYes               | -0.204175642 | 0.8153192 | 0.4334035 | -0.47 | 6.4e-01 |
| chronicneurologicalYes        | 0.059611816  | 1.0614244 | 0.2977174 | 0.20  | 8.4e-01 |
| isdiabetesYes                 | 0.295951175  | 1.3444045 | 0.1099083 | 2.69  | 7.1e-03 |
| immunosuppressiontreatmentYes | -0.137625451 | 0.8714250 | 0.2710732 | -0.51 | 6.1e-01 |
| immunosuppressiondiseaseYes   | 0.992929805  | 2.6991308 | 0.2759074 | 3.60  | 3.2e-04 |
| obesityclinicalYes            | 0.385746701  | 1.4707121 | 0.1403943 | 2.75  | 6.0e-03 |
| hypertensionYes               | 0.064996412  | 1.0671552 | 0.1073305 | 0.61  | 5.4e-01 |
| apache_mean                   | 0.142348747  | 1.1529787 | 0.1142078 | 1.25  | 2.1e-01 |

Random effects

Group Variable Std Dev Variance

trustcode Intercept 0.8683330 0.7540023

>

> # fixed effects

> coeff\_main = fixef(model)

> sd\_main = sqrt(diag(vcov(model)))

> df\_fixed = data.frame(effect = names(coeff\_main),

+       coeff = coeff\_main,

+       coeff\_sd = sd\_main,

+       hr = exp(coeff\_main),

+       hr\_lower = exp(coeff\_main - 2 \* sd\_main),

+       hr\_upper = exp(coeff\_main + 2 \* sd\_main),

```

+         row.names=NULL)
> # write.csv(df_fixed, file = 'fixed_effect_apache.csv')
> # random effects
> coeff_rand = ranef(model)$trustcode
> sd_rand = sqrt(diag(model$variance)[1:length(coeff_rand)])

> df_random = data.frame(effect = names(coeff_rand),
+         coeff = coeff_rand,
+         coeff_sd = sd_rand,
+         hr = exp(coeff_rand),
+         hr_lower = exp(coeff_rand - 2 * sd_rand),
+         hr_upper = exp(coeff_rand + 2 * sd_rand),
+         row.names=NULL)
> # write.csv(df_random, file = 'df_random_apache.csv')

```

### Test random effects

```

> fit1 <- coxph(Surv(death_time , death_ind) ~
+         agecut +
+         sex +
+         chonicrespiratory+
+         asthmarequiring+
+         chronicheart +
+         chronicrenal +
+         chronicliver +
+         chronicneurological +
+         isdiabetes +

```

```

+      immunosuppressiontreatment +
+      immunosuppressiondisease +
+      obesityclinical +
+      hypertension +
+      apache_mean , dat2 )
> print(anova(fit1,model))

```

Analysis of Deviance Table

Cox model: response is Surv(death\_time, death\_ind)

Model 1: ~agecut + sex + chonicrepiratory + asthmarequiring + chronicheart + chronicrenal + chronicliver + chronicneurological + isdiabetes + immunosuppressiontreatment + immunosuppressiondisease + obesityclinical + hypertension + apache\_mean

Model 2: ~agecut + sex + chonicrepiratory + asthmarequiring + chronicheart + chronicrenal + chronicliver + chronicneurological + isdiabetes + immunosuppressiontreatment + immunosuppressiondisease + obesityclinical + hypertension + apache\_mean + (1 | trustcode)

loglik Chisq Df P(>|Chi)

1 -4279.7

2 -4161.8 235.76 1 < 2.2e-16 \*\*\*

---

Signif. codes: 0 '\*\*\*' 0.001 '\*\*' 0.01 '\*' 0.05 '.' 0.1 ' ' 1

> # p\_value for random effect is 2.2e-16

Proportional odds assumption

> ## check ph assumption

> cox\_model = coxph(Surv(death\_time , death\_ind) ~

+ agecut +

+ sex +

+ chonicrepiratory +

+ asthmarequiring +

+ chronicheart +



```

+      chronicrenal +
+      chronicliver +
+      chronicneurological +
+      isdiabetes +
+      immunosuppressiontreatment +
+      immunosuppressiondisease +
+      obesityclinical +
+      apache_mean, dat2)

```

```
> cox.zph(cox_model)
```

|                            | chisq    | df | p     |
|----------------------------|----------|----|-------|
| agecut                     | 1.11e+01 | 4  | 0.025 |
| sex                        | 2.01e-02 | 1  | 0.887 |
| chronicrespiratory         | 2.76e-01 | 1  | 0.600 |
| asthmarequiring            | 2.76e+00 | 1  | 0.097 |
| chronicheart               | 2.58e-01 | 1  | 0.612 |
| chronicrenal               | 4.16e-02 | 1  | 0.838 |
| chronicliver               | 6.35e+00 | 1  | 0.012 |
| chronicneurological        | 1.24e+00 | 1  | 0.266 |
| isdiabetes                 | 6.39e-01 | 1  | 0.424 |
| immunosuppressiontreatment | 3.17e-01 | 1  | 0.573 |
| immunosuppressiondisease   | 9.06e-01 | 1  | 0.341 |
| obesityclinical            | 9.49e-02 | 1  | 0.758 |
| apache_mean                | 7.94e-04 | 1  | 0.978 |
| GLOBAL                     | 2.32e+01 | 16 | 0.109 |

Sensitivity analysis (restrict to patients with only 7 days followup)

```
> model = coxme(Surv(death_time , death_ind) ~  
+     agecut +  
+     sex +  
+     chonicrespiratory+  
+     asthmarequiring+  
+     chronicheart +  
+     chronicrenal +  
+     chronicliver +  
+     chronicneurological +  
+     isdiabetes +  
+     immunosuppressiontreatment +  
+     immunosuppressiondisease +  
+     obesityclinical +  
+     hypertension +  
+     apache_mean +  
+     (1|trustcode), dat2 %>% filter(death_time > 7))
```

```
> summary(model)
```

Cox mixed-effects model fit by maximum likelihood

Data: dat2 %>% filter(death\_time > 7)

events, n = 303, 1983

Iterations= 17 125

NULL Integrated Fitted

Log-likelihood -2102.549 -1965.555 -1891.01

Chisq df p AIC BIC

Integrated loglik 273.99 18.00 0 237.99 171.14

Penalized loglik 423.08 70.18 0 282.72 22.09

Model: Surv(death\_time, death\_ind) ~ agecut + sex + chonicrespiratory + asthmarequiring + chronicheart + chronicrenal + chronicliver + chronicneurological + isdiabetes + immunosuppressiontreatment + immunosuppressiondisease + obesityclinical + hypertension + apache\_mean + (1 | trustcode)

Fixed coefficients

|                               | coef        | exp(coef) | se(coef)  | z     | p       |
|-------------------------------|-------------|-----------|-----------|-------|---------|
| agecut[50,60]                 | 0.26826437  | 1.3076928 | 0.2311499 | 1.16  | 2.5e-01 |
| agecut[60,70]                 | 0.89731735  | 2.4530137 | 0.2173021 | 4.13  | 3.6e-05 |
| agecut[70,80]                 | 1.19032366  | 3.2881453 | 0.2361042 | 5.04  | 4.6e-07 |
| agecut[80,999]                | 1.76714363  | 5.8541080 | 0.3060082 | 5.77  | 7.7e-09 |
| sexMale                       | 0.32593990  | 1.3853321 | 0.1423201 | 2.29  | 2.2e-02 |
| chonicrespiratoryYes          | 0.20071042  | 1.2222708 | 0.2306903 | 0.87  | 3.8e-01 |
| asthmarequiringYes            | 0.37435721  | 1.4540565 | 0.2040478 | 1.83  | 6.7e-02 |
| chronicheartYes               | 0.60362269  | 1.8287317 | 0.2058135 | 2.93  | 3.4e-03 |
| chronicrenalYes               | 0.60084187  | 1.8236534 | 0.3002572 | 2.00  | 4.5e-02 |
| chronicliverYes               | 0.17025366  | 1.1856056 | 0.4818020 | 0.35  | 7.2e-01 |
| chronicneurologicalYes        | 0.22627541  | 1.2539210 | 0.3962750 | 0.57  | 5.7e-01 |
| isdiabetesYes                 | 0.28228305  | 1.3261540 | 0.1600019 | 1.76  | 7.8e-02 |
| immunosuppressiontreatmentYes | -0.03971823 | 0.9610602 | 0.3780080 | -0.11 | 9.2e-01 |
| immunosuppressiondiseaseYes   | 0.72958801  | 2.0742259 | 0.4256785 | 1.71  | 8.7e-02 |
| obesityclinicalYes            | 0.23764107  | 1.2682539 | 0.1993900 | 1.19  | 2.3e-01 |
| hypertensionYes               | 0.17030782  | 1.1856698 | 0.1528342 | 1.11  | 2.7e-01 |
| apache_mean                   | 0.11008774  | 1.1163760 | 0.1283131 | 0.86  | 3.9e-01 |

Random effects

| Group     | Variable  | Std Dev   | Variance  |
|-----------|-----------|-----------|-----------|
| trustcode | Intercept | 0.8988636 | 0.8079557 |
